# Supplementary material for: Association between prenatal or postpartum exposure to tobacco smoking and allergic rhinitis in the offspring: An updated meta-analysis of nine cohort studies
Source: PubMed Central journal article supplement (PMC8996217; doi:10.18332/tid/146905), 2022-04-11
Supplement: TID-20-37-s1.pdf [file TID-20-37-s1.pdf]

## **Supplementary Material**

Supplementary Figure 1. Sensitivity analysis of the association between allergic rhinitis and prenatal smoke exposure

Supplementary Figure 2. Sensitivity analysis of the association between allergic rhinitis and postpartum smoke exposure

Supplementary Figure 3. Funnel plot for assessment of publication bias in association between allergic rhinitis and prenatal smoke exposure

Supplementary Figure 4. Funnel plot for assessment of publication bias in association between allergic rhinitis and postpartum smoke exposure

Supplementary Table S1 Search strategy

Supplementary Table 2. NOS criteria for quality of cohort study.

Supplementary Table 3. Study and patient characteristics

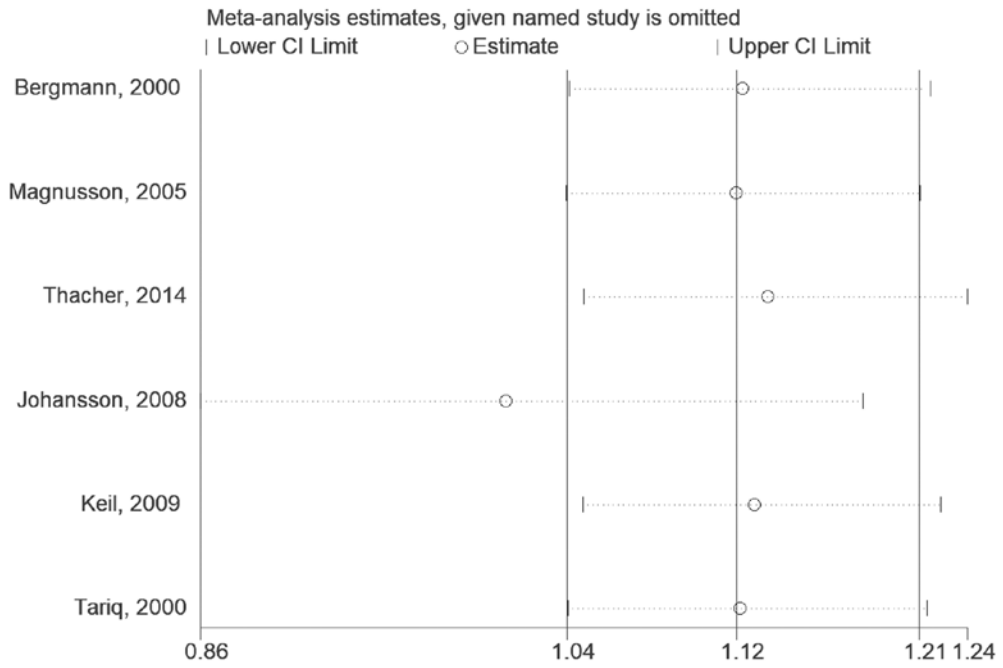

Supplementary Figure 1. Sensitivity analysis of the association between allergic rhinitis and prenatal smoke exposure

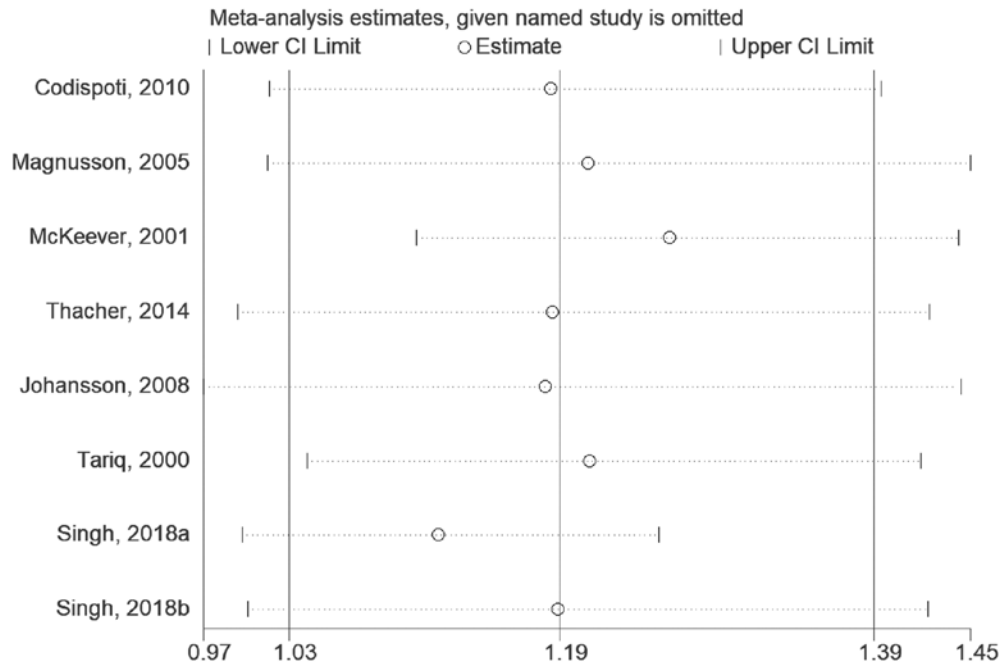

Supplementary Figure 2. Sensitivity analysis of the association between allergic rhinitis and postpartum smoke exposure

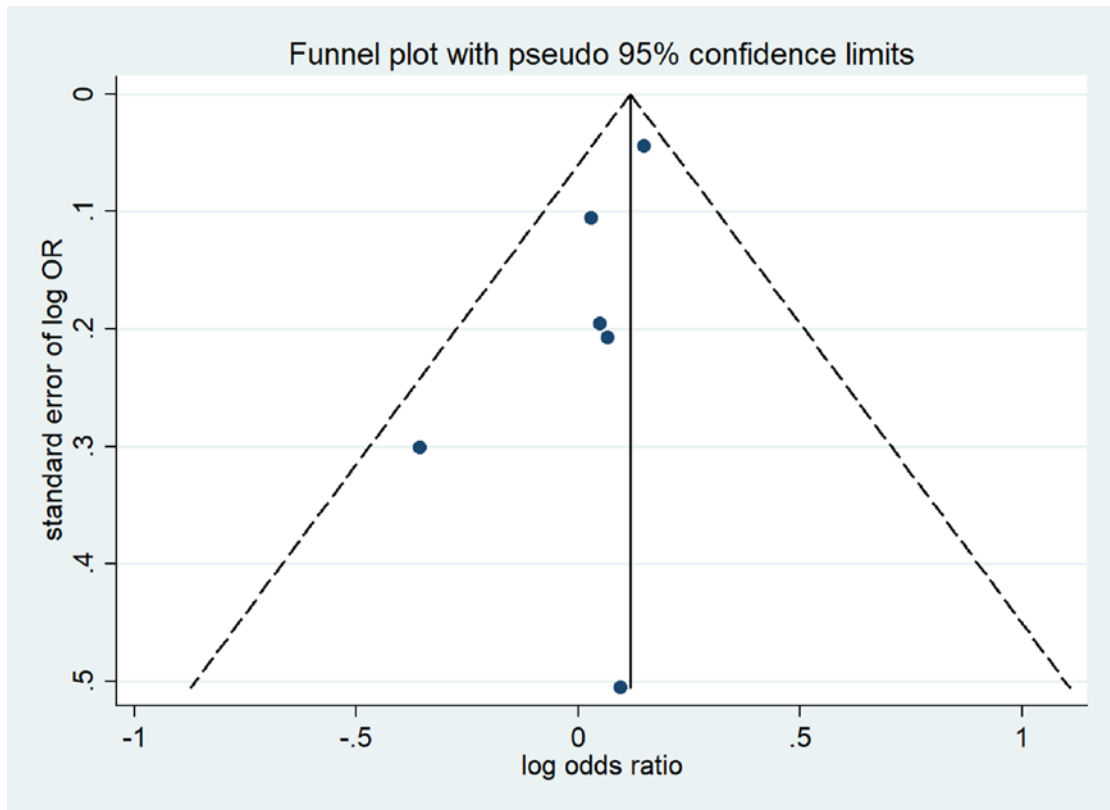

Supplementary Figure 3. Funnel plot for assessment of publication bias in association between allergic rhinitis and prenatal smoke exposure

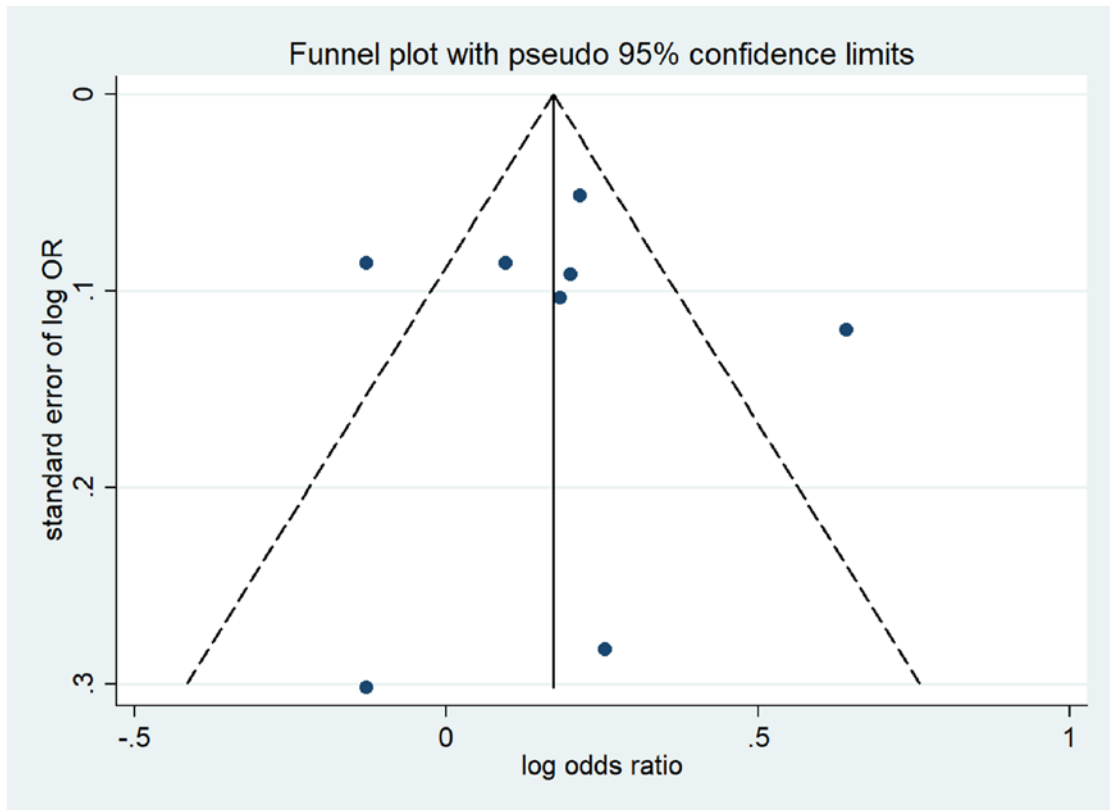

Supplementary Figure 4. Funnel plot for assessment of publication bias in association between allergic rhinitis and postpartum smoke exposure

**Supplementary Table S1.** Search terms and strategy.

Date:2020/07/20

| <b>PubMed</b>       |           | <b>Search strategy</b>                                                                                                                                                                                                                                                                                                                                                                                                                                                                                                                 | <b>Numbers</b> |
|---------------------|-----------|----------------------------------------------------------------------------------------------------------------------------------------------------------------------------------------------------------------------------------------------------------------------------------------------------------------------------------------------------------------------------------------------------------------------------------------------------------------------------------------------------------------------------------------|----------------|
| <b>Patient</b>      | <b>#1</b> | (maternal[Title/Abstract]) OR (mother*[Title/Abstract])<br>OR (father*[Title/Abstract]) OR (parent*[Title/Abstract])                                                                                                                                                                                                                                                                                                                                                                                                                   | 784687         |
| <b>Intervention</b> | <b>#2</b> | "Smoking"[Mesh] OR (Smoking Behaviors[Title/Abstract]<br>OR Behavior, Smoking[Title/Abstract] OR Behaviors,<br>Smoking[Title/Abstract] OR Smoking<br>Behavior[Title/Abstract] OR Smoking<br>Habit[Title/Abstract] OR Habit, Smoking[Title/Abstract]<br>OR Habits, Smoking[Title/Abstract] OR Smoking<br>Habits[Title/Abstract])                                                                                                                                                                                                        | 156168         |
|                     | <b>#3</b> | ("Tobacco Use"[Mesh]) OR (Tobacco Uses[Title/Abstract]<br>OR Tobacco Chewing[Title/Abstract] OR Chewing,<br>Tobacco[Title/Abstract] OR Tobacco<br>Consumption[Title/Abstract] OR Consumption,<br>Tobacco[Title/Abstract])                                                                                                                                                                                                                                                                                                              | 8925           |
|                     | <b>#4</b> | #2 OR #3                                                                                                                                                                                                                                                                                                                                                                                                                                                                                                                               | 159466         |
| <b>Outcome</b>      | <b>#5</b> | (((((child[Title/Abstract]) OR (children[Title/Abstract]))<br>OR (teen*[Title/Abstract])) OR<br>(adolescent[Title/Abstract]) OR (infant[Title/Abstract]))<br>OR (newborn[Title/Abstract])) OR<br>(offspring[Title/Abstract]) OR (childhood[Title/Abstract]))<br>OR (preschool[Title/Abstract])                                                                                                                                                                                                                                         | 1790788        |
|                     | <b>#6</b> | ((("Rhinitis, Allergic"[Mesh] ) OR (Allergic<br>Rhinitides[Title/Abstract] OR Rhinitides,<br>Allergic[Title/Abstract] OR Allergic<br>Rhinitis[Title/Abstract]) OR "Rhinitis, Allergic,<br>Seasonal"[Mesh] ) OR (Seasonal Allergic<br>Rhinitis[Title/Abstract] OR Allergic Rhinitides,<br>Seasonal[Title/Abstract] OR Allergic Rhinitis,<br>Seasonal[Title/Abstract] OR Rhinitides, Seasonal<br>Allergic[Title/Abstract] OR Rhinitis, Seasonal<br>Allergic[Title/Abstract] OR Seasonal Allergic<br>Rhinitides[Title/Abstract] OR Pollen | 33150          |

---

|                   |           |                                                                                                                                                                                                                                                                                                                                                                                                              |         |
|-------------------|-----------|--------------------------------------------------------------------------------------------------------------------------------------------------------------------------------------------------------------------------------------------------------------------------------------------------------------------------------------------------------------------------------------------------------------|---------|
|                   |           | Allergy[Title/Abstract] OR Allergies, Pollen[Title/Abstract]<br>OR Allergy, Pollen[Title/Abstract] OR Pollen<br>Allergies[Title/Abstract] OR Pollinosis[Title/Abstract] OR<br>Pollinoses[Title/Abstract] OR Hay Fever[Title/Abstract]<br>OR Fever, Hay[Title/Abstract] OR<br>Hayfever[Title/Abstract]) OR "Rhinitis, Allergic,<br>Perennial"[Mesh] ) OR (Rhinitis, Allergic,<br>Nonseasonal[Title/Abstract]) |         |
|                   | <b>#7</b> | #5 AND #6                                                                                                                                                                                                                                                                                                                                                                                                    | 6684    |
| <b>Study type</b> | <b>#8</b> | (cohort) OR (follow?up stud*) OR (longitudinal stud*) OR<br>(odds ratio) OR (relative?risk) OR (rate?ratio) OR (hazard<br>ratio) OR (prospective) OR (retrospective)                                                                                                                                                                                                                                         | 4978211 |
| <b>ALL</b>        | <b>#9</b> | #1 AND #4 AND #7 AND #8                                                                                                                                                                                                                                                                                                                                                                                      | 81      |

---

| <b>Embase</b>       |           | <b>Search strategy</b>                                                                                                                                                                                                                                                                                                                                                                                                                                                                                                                                                                                                                                                                    | <b>Numbers</b> |
|---------------------|-----------|-------------------------------------------------------------------------------------------------------------------------------------------------------------------------------------------------------------------------------------------------------------------------------------------------------------------------------------------------------------------------------------------------------------------------------------------------------------------------------------------------------------------------------------------------------------------------------------------------------------------------------------------------------------------------------------------|----------------|
| <b>Patient</b>      | <b>#1</b> | 'maternal':ab,ti OR 'mother*':ab,ti OR 'father*':ab,ti OR 'parent*':ab,ti                                                                                                                                                                                                                                                                                                                                                                                                                                                                                                                                                                                                                 | 994953         |
| <b>Intervention</b> | <b>#2</b> | 'smoking'/exp OR 'smoking behaviors':ab,ti OR 'behavior, smoking':ab,ti OR 'behaviors, smoking':ab,ti OR 'smoking behavior':ab,ti OR 'smoking habit':ab,ti OR 'habit, smoking':ab,ti OR 'habits, smoking':ab,ti OR 'smoking habits':ab,ti                                                                                                                                                                                                                                                                                                                                                                                                                                                 | 397080         |
|                     | <b>#3</b> | 'tobacco use'/exp OR 'tobacco uses':ab,ti OR 'tobacco chewing':ab,ti OR 'chewing, tobacco':ab,ti OR 'tobacco consumption':ab,ti OR 'consumption, tobacco':ab,ti                                                                                                                                                                                                                                                                                                                                                                                                                                                                                                                           | 402445         |
|                     | <b>#4</b> | #2 OR #3                                                                                                                                                                                                                                                                                                                                                                                                                                                                                                                                                                                                                                                                                  | 407110         |
| <b>Outcome</b>      | <b>#5</b> | 'allergic rhinitis'/exp OR 'allergic rhinitides':ab,ti OR 'rhinitides, allergic':ab,ti OR 'allergic rhinitis':ab,ti OR 'pollen allergy'/exp OR 'perennial rhinitis'/exp OR 'seasonal allergic rhinitis':ab,ti OR 'allergic rhinitides, seasonal':ab,ti OR 'allergic rhinitis, seasonal':ab,ti OR 'rhinitides, seasonal allergic':ab,ti OR 'rhinitis, seasonal allergic':ab,ti OR 'seasonal allergic rhinitides':ab,ti OR 'pollen allergy':ab,ti OR 'allergies, pollen':ab,ti OR 'allergy, pollen':ab,ti OR 'pollen allergies':ab,ti OR 'pollinosis':ab,ti OR 'pollinoses':ab,ti OR 'hay fever':ab,ti OR 'fever, hay':ab,ti OR 'hayfever':ab,ti OR 'rhinitis, allergic, nonseasonal':ab,ti | 52869          |
|                     | <b>#6</b> | 'child'/exp OR 'child' OR 'children':ab,ti OR 'teen*':ab,ti OR 'adolescent':ab,ti OR 'infant':ab,ti OR 'newborn':ab,ti OR 'offspring':ab,ti OR 'childhood':ab,ti OR 'preschool':ab,ti                                                                                                                                                                                                                                                                                                                                                                                                                                                                                                     | 3804059        |
|                     | <b>#7</b> | #5 AND #6                                                                                                                                                                                                                                                                                                                                                                                                                                                                                                                                                                                                                                                                                 | 14736          |
| <b>Study type</b>   | <b>#8</b> | cohort OR 'follow?up stud*' OR 'longitudinal stud*' OR 'odds ratio' OR relative?risk OR rate?ratio OR 'hazard ratio' OR prospective OR retrospective                                                                                                                                                                                                                                                                                                                                                                                                                                                                                                                                      | 3142178        |
| <b>Total</b>        | <b>#9</b> | #1 AND #4 AND #7 AND #8                                                                                                                                                                                                                                                                                                                                                                                                                                                                                                                                                                                                                                                                   | 191            |



**Supplementary Table 2.** NOS criteria for quality of cohort study.

| Study           | Representativeness of the exposed cohort | Selection of the non-exposed cohort | Ascertainment of exposure | Demonstration that outcome of interest was not present at start of study | Comparability of cohorts on the basis of the design or analysis | Assessment of outcome | Was follow-up long enough for outcomes to occur | Adequacy of follow-up of cohorts | Total quality scores |
|-----------------|------------------------------------------|-------------------------------------|---------------------------|--------------------------------------------------------------------------|-----------------------------------------------------------------|-----------------------|-------------------------------------------------|----------------------------------|----------------------|
| Bergmann, 2000  | ☆                                        | ☆                                   | ☆                         | ☆                                                                        | ☆                                                               | ☆                     | ☆                                               | ☆                                | 8                    |
| Codispoti, 2010 | ☆                                        | /                                   | ☆                         | ☆                                                                        | ☆                                                               | ☆                     | ☆                                               | /                                | 7                    |
| Magnusson, 2005 | ☆                                        | ☆                                   | ☆                         | /                                                                        | ☆                                                               | ☆                     | ☆                                               | ☆                                | 7                    |
| McKeever, 2001  | ☆                                        | /                                   | ☆                         | ☆                                                                        | ☆                                                               | ☆                     | ☆                                               | ☆                                | 7                    |

|                    |   |   |   |   |    |   |   |   |   |
|--------------------|---|---|---|---|----|---|---|---|---|
| Thacher,<br>2014   | ☆ | ☆ | ☆ | / | ☆  | ☆ | ☆ | ☆ | 7 |
| Johansson,<br>2008 | ☆ | ☆ | ☆ | ☆ | ☆  | ☆ | ☆ | ☆ | 8 |
| Keil, 2009         | ☆ | ☆ | ☆ | ☆ | ☆  | ☆ | ☆ | ☆ | 8 |
| Tariq, 2000        | ☆ | ☆ | ☆ | / | ☆  | ☆ | ☆ | ☆ | 7 |
| Singh, 2018        | ☆ | ☆ | ☆ | ☆ | ☆☆ | ☆ | ☆ | ☆ | 9 |

**Supplementary Table 3.** Study and patient characteristics

| Study          | Country | Number | Age of assessment | Source of exposure | OR (95%CI)             | Variables of Adjustment, Matching, or Restriction                                                              | Type of active or passive | Diagnosis                                                                | Number of cigarettes |
|----------------|---------|--------|-------------------|--------------------|------------------------|----------------------------------------------------------------------------------------------------------------|---------------------------|--------------------------------------------------------------------------|----------------------|
| Bergmann, 2000 | Germany | 825    | 3-6 y             | Mother             | pre-: 1.05 (0.72–1.55) | Age, sex, parental atopy, socioeconomic status, breastfeeding, aeroallergen and food sensitivity, study center | Active                    | Questionnaires, and had multi-allergen screening tests for sensitization | /                    |

|                    |             |       |            |         |                                         |                                                                                             |         |                       |   |
|--------------------|-------------|-------|------------|---------|-----------------------------------------|---------------------------------------------------------------------------------------------|---------|-----------------------|---|
| Codispoti,<br>2010 | USA         | 361   | 3 y        | Parents | post-: 1.29 (0.74–2.24)                 | Unadjusted                                                                                  | Passive | House dust<br>samples | / |
|                    |             |       |            |         |                                         | Socio-economi<br>c group,<br>maternal<br>occupation,<br>maternal age in                     |         |                       |   |
| Magnusson,<br>2005 | Den<br>mark | 7844  | 14-18<br>y | Parents | pre-:1.1(0.4-2.9)<br>post-:1.1(1.0-1.4) | pregnancy,<br>coffee<br>consumption in<br>pregnancy,<br>parity,<br>breastfeeding,<br>gender | Passive | Questionnaires        | / |
| McKeever           | UK          | 29238 | Up to 6    | Mother  | post-:0.88(0.75-1.05)                   | Unadjusted                                                                                  | Active  | /                     | / |

| Year            | Country   | n    | Age (y)    | Exposure               | OR (95% CI)                                       | Study Design                                                                              | Outcome            | Method         |                        |
|-----------------|-----------|------|------------|------------------------|---------------------------------------------------|-------------------------------------------------------------------------------------------|--------------------|----------------|------------------------|
| , 2001          |           |      | y          |                        |                                                   | Parental smoking throughout childhood                                                     | Active             | Questionnaires |                        |
| Thacher, 2014   | Swe den   | 3798 | Up to 16 y | Mother                 | pre-: 1.03 (0.84-1.27)<br>post-: 1.22 (1.02-1.46) | Parental smoking throughout childhood                                                     | Active             | Questionnaires | Above 1 cigarette /day |
| Johansson, 2008 | Swe den   | 8850 | 3 y        | Mother or both parents | pre-: 1.16 (1.06–1.26)<br>post-1.24 (1.12-1.37)   | Age, mothers' education, family type                                                      | Active and Passive | Questionnaires | /                      |
| Keil, 2009      | Ger man y | 784  | 10 y       | Parents                | pre-: 0.7 (0.4–1.3)                               | Age, sex, birth weight, breast feeding, siblings, pets, parental education, IgE, location | Passive            | Questionnaires | /                      |

|                 |       |       |        |         |                                                         |            |         |                                |   |
|-----------------|-------|-------|--------|---------|---------------------------------------------------------|------------|---------|--------------------------------|---|
| Tariq,<br>2000  | UK    | 1218  | 4 y    | Mother  | pre-: 1.07 (0.79–1.78)<br>post-: 0.88 (0.49, 1.60)      | Age        | Active  | Recorded<br>at recruitment     | / |
| Singh,<br>2018a | India | 44928 | 6-7y   | Parents | post-: Mother:1.9<br>(1.5-2.4), Father:1.4<br>(1.2-1.5) | Unadjusted | Passive | Environmental<br>questionnaire | / |
| Singh,<br>2018b | India | 48088 | 13-14y | Parents | post-: Mother:1.2<br>(1.0-1.5), Father:1.0<br>(0.9-1.1) | Unadjusted | Passive | Environmental<br>questionnaire | / |
